# Supplementary material for: Effect of the Interaction between Dietary Patterns and the Gastric Microbiome on the Risk of Gastric Cancer
Source: MDPI journal article supplement (doi:10.3390/nu13082692), 2021-08-03
Supplement: s1 [file s1]

## Supplementary Material

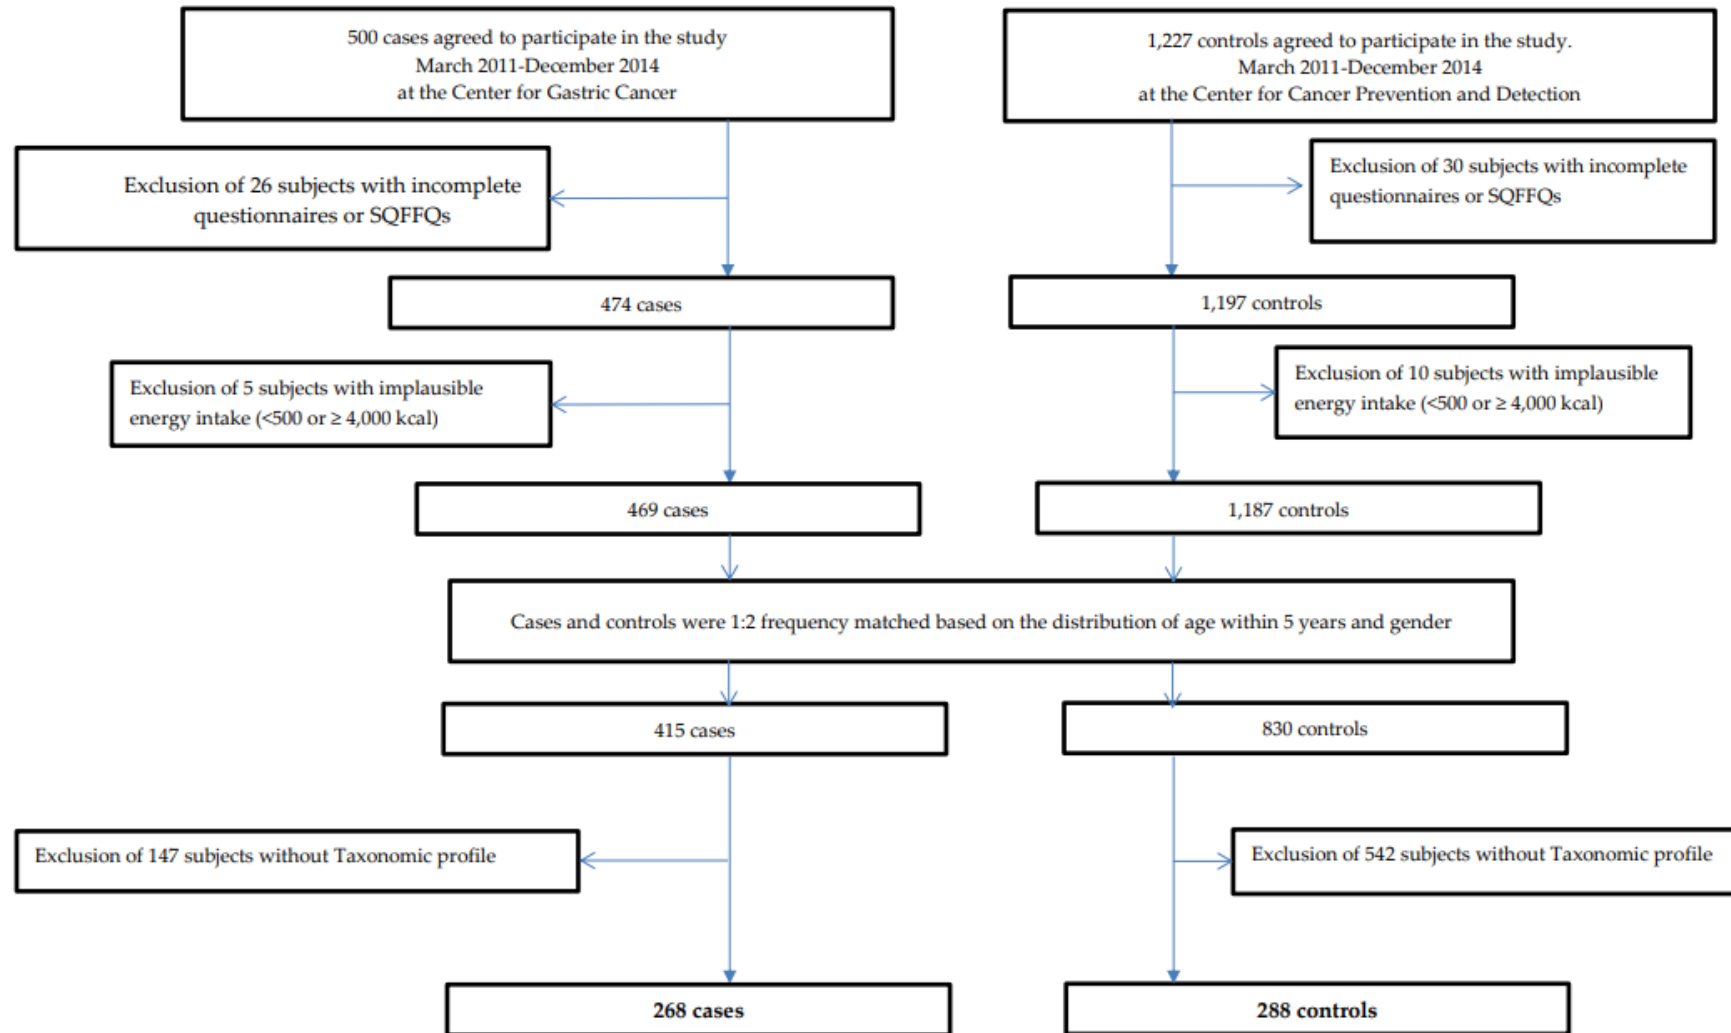

Figure S1. Flow Chart for the selection of study participants

**Table S1.** List of the food items included in the 33 food groups in the dietary patterns

| Food group                   | Food items                                                                                                                                                                                                                                                                                                                                                                                                |
|------------------------------|-----------------------------------------------------------------------------------------------------------------------------------------------------------------------------------------------------------------------------------------------------------------------------------------------------------------------------------------------------------------------------------------------------------|
| Refined grains               | White rice, Wheat flour, Milled sorghum, Milled millets                                                                                                                                                                                                                                                                                                                                                   |
| Whole grains                 | Brown rice, Black rice, White gluten rice, Barley, Sorghum, Millet, Adlay                                                                                                                                                                                                                                                                                                                                 |
| Tubers and roots             | Potato, Sweet potato, Potato starch, Acorn jello                                                                                                                                                                                                                                                                                                                                                          |
| Noodles                      | Ramen, Buckwheat noodle, Chinese noodle, Knife-cut noodle                                                                                                                                                                                                                                                                                                                                                 |
| Rice cakes                   | Rice cakes                                                                                                                                                                                                                                                                                                                                                                                                |
| Bread                        | Plain bread, cream bread, Red bean bread, Hardtack, Streusel, Donut                                                                                                                                                                                                                                                                                                                                       |
| Cereals and snacks           | Cereal, Biscuits, Cookie, Cracker, Rice cookie, Flour chip, Shrimp chip, Potato chip, Corn chip                                                                                                                                                                                                                                                                                                           |
| Pizza, hamburger             | Pizza, Hamburger                                                                                                                                                                                                                                                                                                                                                                                          |
| Cakes and sweets             | Sponge cake, Roll cake, Cream cake, Pound cake, Hot cake, Choco pie, Caramel, Chocolate, Honey, Sugar, Candy taffy                                                                                                                                                                                                                                                                                        |
| Legumes                      | Green pea, Soybean                                                                                                                                                                                                                                                                                                                                                                                        |
| Tofu/soymilk                 | Tofu, Soy milk                                                                                                                                                                                                                                                                                                                                                                                            |
| Nuts and seeds               | Almond, Pine nuts, Pea nuts, Sesame seed, Perilla                                                                                                                                                                                                                                                                                                                                                         |
| Red meat                     | Beef, Pork, Dog meat                                                                                                                                                                                                                                                                                                                                                                                      |
| Meat byproducts              | Beef (small intestine), Pork feet                                                                                                                                                                                                                                                                                                                                                                         |
| Processed meat               | Ham, Bacon, Sausage                                                                                                                                                                                                                                                                                                                                                                                       |
| Poultry                      | Chicken                                                                                                                                                                                                                                                                                                                                                                                                   |
| Fish                         | Fatty fish (Mackerel, Pacific saury, Tuna, and Eel), Lean fish (Scabbard fish, Halibut, Flounder, Alaskan pollock, Yellow corvina, Sea bass, and Tile fish), Bone fish (Anchovy)                                                                                                                                                                                                                          |
| Seafood and seafood products | Clam, Oyster, Crab, Shrimp, Octopus, Squid, Salted fermented seafood, Fish paste                                                                                                                                                                                                                                                                                                                          |
| seaweeds                     | Laver, Kelp, Sea tangle, Sea mustard                                                                                                                                                                                                                                                                                                                                                                      |
| Eggs                         | Eggs, Quail's egg                                                                                                                                                                                                                                                                                                                                                                                         |
| Milk                         | Whole milk, Low -fat milk,                                                                                                                                                                                                                                                                                                                                                                                |
| Dairy products               | Liquid yogurt, Curd yogurt, Cheese, Ice cream, Sherbet                                                                                                                                                                                                                                                                                                                                                    |
| Fruits                       | Strawberry, Oriental melon, Melon, Watermelon, Peach, Plum, Banana, Persimmon, Tangerine, Pear, Apple, Orange, Grapes                                                                                                                                                                                                                                                                                     |
| Fruit products               | Jam, Canned fruits, Fruit juice                                                                                                                                                                                                                                                                                                                                                                           |
| Green/yellow vegetables      | Carrot, Spinach, Leeks, Broccoli, Tomato, Dropwort, Green onion, Pumpkin, Sweet pumpkin, Zucchini, Squash, Pumpkin leaves, Korean lettuce, Sesame leaves, Lettuce, Kale, Mugwort, Crown daisy, Shepherd purse, Makino, bracken, Miquel, Chamnamul, Chwinamul, Chicory, Bok choy, Nakai, Taro stem, Sweet potato stem, Green chili, Red chili, Pepper leaves, Horseradish leaf, Beet leaves, Curled mallow |

|                          |                                                                                                                                                                                                   |
|--------------------------|---------------------------------------------------------------------------------------------------------------------------------------------------------------------------------------------------|
| Light-colored vegetables | Radish, Brussels sprouts, Chinese cabbage, Celery, Onion, Cucumber, Bean sprouts, Burdock, Lotus root, Bellflower, Deodeok, Garlic, Ginger                                                        |
| Pickled vegetables       | Garlic pickle, Garlic stem pickle, Radish pickle, Cucumber pickle, Sesame leaf pickle, Chili pickle                                                                                               |
| Kimchi                   | Cabbage kimchi red, Cabbage kimchi white, Radish kimchi red, Radish kimchi white, Gatkimchi, Korean lettuce kimchi, Green onion kimchi                                                            |
| Mushrooms                | Oyster mushroom, Ear mushroom, Songi mushroom, Button mushroom, Enokitake, Shiitake mushroom,                                                                                                     |
| Oil/fat                  | Margarine, Butter, Cooking oil, Coffee cream,<br>Soybean paste, Soy sauce, Mustard, Red pepper powder, Red pepper paste, Salt, Sesame salt, Vinegar, Pepper powder, Tomato ketchup, Pine needles, |
| Condiments/seasonings    | Yeast                                                                                                                                                                                             |
| Carbonated beverages     | Soda                                                                                                                                                                                              |
| Coffee/tea               | Black herbal tea, Citron tea, Ginseng tea, Sweet rice drink, Instant coffee, Green tea                                                                                                            |

---

**Table S2.** Association between dietary pattern networks derived from GGMs and the GC risk in the male population

| Dietary patterns       | No. of controls | No. of patients | Model I OR (95% CI) | Model II OR (95% CI) | Model III OR (95% CI) |
|------------------------|-----------------|-----------------|---------------------|----------------------|-----------------------|
| Vegetables and seafood |                 |                 |                     |                      |                       |
| T1 (Low)               | 61 (33.7)       | 64 (37.2)       | 1.00                | 1.00                 | 1.00                  |
| T2 (Medium)            | 60 (33.2)       | 70 (40.7)       | 1.11 (0.68-1.82)    | 1.09 (0.60-2.00)     | 1.05 (0.57-1.93)      |
| T3 (High)              | 60 (33.2)       | 38 (22.1)       | 0.60 (0.35-1.03)    | 0.57 (0.30-1.09)     | 0.56 (0.29-1.08)      |
| p for trend            |                 |                 | 0.047               | 0.068                | 0.067                 |
| Meats and snacks       |                 |                 |                     |                      |                       |
| T1 (Low)               | 61 (33.7)       | 70 (40.7)       | 1.00                | 1.00                 | 1.00                  |
| T2 (Medium)            | 59 (32.6)       | 52 (30.2)       | 0.77 (0.46-1.28)    | 1.13 (0.60-2.15)     | 1.17 (0.61-2.24)      |
| T3 (High)              | 61 (33.7)       | 50 (29.1)       | 0.71 (0.43-1.19)    | 1.90 (0.87-4.18)     | 1.83 (0.83-4.04)      |
| p for trend            |                 |                 | 0.265               | 0.087                | 0.122                 |
| Fruit                  |                 |                 |                     |                      |                       |
| T1 (Low)               | 60 (33.2)       | 71 (41.3)       | 1.00                | 1.00                 | 1.00                  |
| T2 (Medium)            | 61 (33.7)       | 57 (33.1)       | 0.79 (0.48-1.30)    | 0.70 (0.38-1.29)     | 0.68 (0.36-1.27)      |
| T3 (High)              | 60 (33.2)       | 44 (25.6)       | 0.62 (0.37-1.04)    | 0.60 (0.32-1.14)     | 0.64 (0.33-1.22)      |
| p for trend            |                 |                 | 0.080               | 0.150                | 0.223                 |

Model I: crude model; Model II: adjusted for age, family history of gastric cancer, smoking status, regular exercise, education, occupation, income and total energy intake; Model III: additionally adjusted for the HP infection status. GGMs, Gaussian graphical models; GC, gastric cancer

**Table S3.** Combined effect of dietary patterns and MDI on the GC risk in the total population

| Dietary patterns       | MDI [Low: <3.88] |                  | MDI [High: >=3.88] |                  | p-interaction |
|------------------------|------------------|------------------|--------------------|------------------|---------------|
|                        | Low              | High             | Low                | High             |               |
| Vegetables and seafood |                  |                  |                    |                  |               |
| No. Controls/Patients  | 76/78            | 69/49            | 68/69              | 75/72            |               |
| Crude OR               | 1.00 (ref)       | 0.69 (0.43-1.12) | 0.99 (0.62-1.57)   | 0.94 (0.60-1.47) | 0.361         |
| Model I OR             | 1.00 (ref)       | 0.63 (0.36-1.09) | 1.18 (0.70-2.00)   | 1.04 (0.62-1.75) | 0.393         |
| Model II OR            | 1.00 (ref)       | 0.64 (0.36-1.12) | 1.05 (0.62-1.79)   | 0.91 (0.54-1.55) | 0.427         |
| Meats and beverages    |                  |                  |                    |                  |               |
| No. Controls/Patients  | 68/81            | 77/46            | 76/80              | 67/61            |               |
| Crude OR               | 1.00 (ref)       | 0.50 (0.31-0.82) | 0.88 (0.56-1.39)   | 0.76 (0.48-1.23) | 0.113         |
| Model I OR             | 1.00 (ref)       | 0.78 (0.42-1.45) | 1.09 (0.66-1.84)   | 1.33 (0.72-2.44) | 0.258         |
| Model II OR            | 1.00 (ref)       | 0.74 (0.39-1.40) | 0.95 (0.56-1.62)   | 1.12 (0.60-2.09) | 0.245         |
| Snacks                 |                  |                  |                    |                  |               |
| No. Controls/Patients  | 71/80            | 74/47            | 73/78              | 70/63            |               |

|                       |            |                  |                  |                  |       |
|-----------------------|------------|------------------|------------------|------------------|-------|
| Crude OR              | 1.00 (ref) | 0.56 (0.35-0.92) | 0.95 (0.60-1.49) | 0.80 (0.50-1.27) | 0.242 |
| Model I OR            | 1.00 (ref) | 0.63 (0.35-1.13) | 0.88 (0.52-1.47) | 1.45 (0.81-2.57) | 0.015 |
| Model II OR           | 1.00 (ref) | 0.68 (0.37-1.24) | 0.80 (0.48-1.36) | 1.31 (0.73-2.34) | 0.029 |
| Dairy                 |            |                  |                  |                  |       |
| No. Controls/Patients | 71/81      | 74/46            | 73/83            | 70/58            |       |
| Crude OR              | 1.00 (ref) | 0.55 (0.34-0.89) | 0.99 (0.64-1.56) | 0.73 (0.45-1.16) | 0.398 |
| Model I OR            | 1.00 (ref) | 0.79 (0.45-1.39) | 1.22 (0.73-2.03) | 1.19 (0.67-2.09) | 0.588 |
| Model II OR           | 1.00 (ref) | 0.75 (0.42-1.35) | 1.05 (0.63-1.78) | 1.02 (0.57-1.81) | 0.531 |
| Fruit                 |            |                  |                  |                  |       |
| No. Controls/Patients | 69/92      | 76/35            | 75/89            | 68/52            |       |
| Crude OR              | 1.00 (ref) | 0.35 (0.21-0.57) | 0.89 (0.57-1.38) | 0.57 (0.36-0.92) | 0.078 |
| Model I OR            | 1.00 (ref) | 0.44 (0.24-0.78) | 1.20 (0.72-1.99) | 0.67 (0.38-1.18) | 0.522 |
| Model II OR           | 1.00 (ref) | 0.49 (0.27-0.88) | 1.11 (0.66-1.86) | 0.62 (0.35-1.10) | 0.715 |

---

Model I: adjusted for age, sex, family history of GC, regular exercise, education, occupation, income, and total energy intake. Model II: additionally adjusted for the HP infection status. CI, confidence interval; GC, gastric cancer; MDI, microbial dysbiosis index; OR, odds ratio
